# Supplementary material for: Providencia entomophila sp. nov., a new bacterial species associated with major olive pests in Tunisia
Source: PubMed Central journal article supplement (PMC6805009; doi:10.1371/journal.pone.0223943), 2019-10-22
Supplement: pone.0223943.s005.pdf [file pone.0223943.s005.pdf]

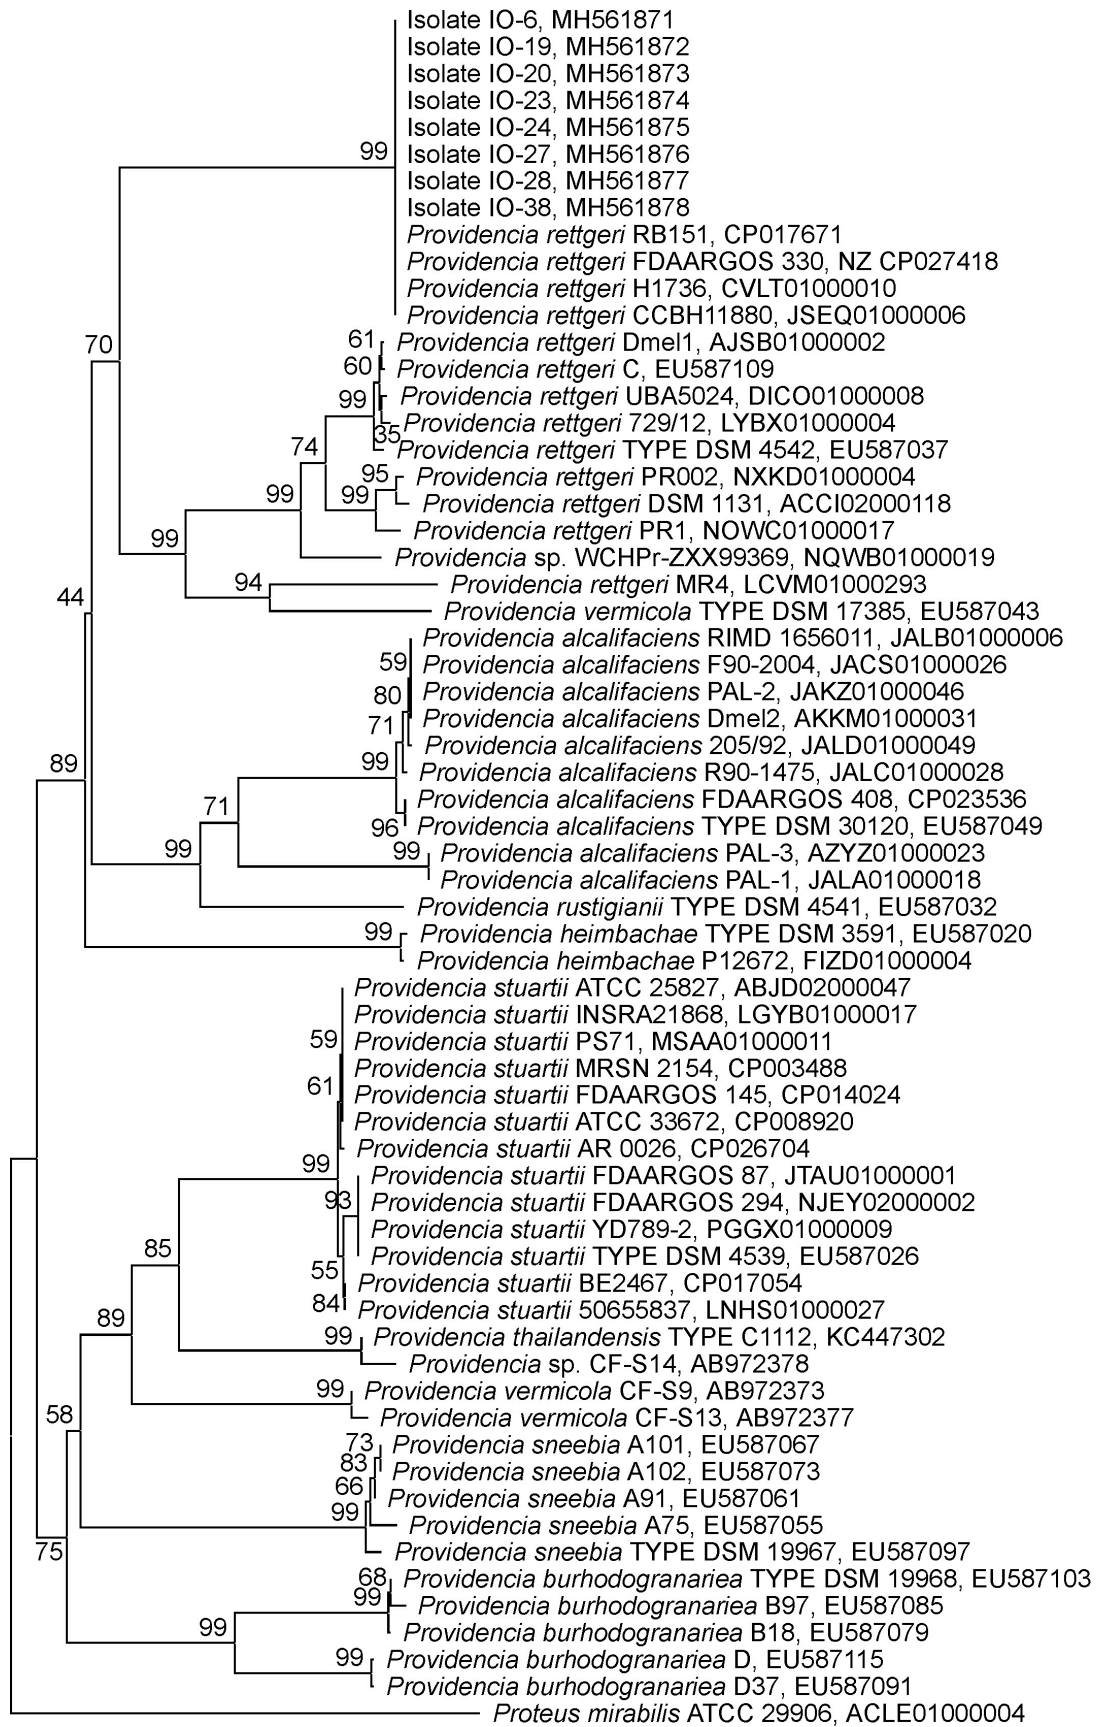

—

**S4 Fig. *gyrB* gene NJ tree.** Neighbor Joining (NJ) phylogeny of *Providencia* bacteria as reconstructed from *gyrB* gene sequences. Terminal branches are labelled by genus, species and strain designations as well as GenBank accession numbers. Numbers on branches indicate bootstrap support values. The size bar corresponds to 1 % sequence divergence. An orthologous sequence from the closely related bacterium *Proteus mirabilis* has been used as outgroup.
